# Supplementary material for: Identification of Antitumor miR-30e-5p Controlled Genes; Diagnostic and Prognostic Biomarkers for Head and Neck Squamous Cell Carcinoma
Source: MDPI journal article supplement (doi:10.3390/genes13071225), 2022-07-09
Supplement: s1 [file s1]

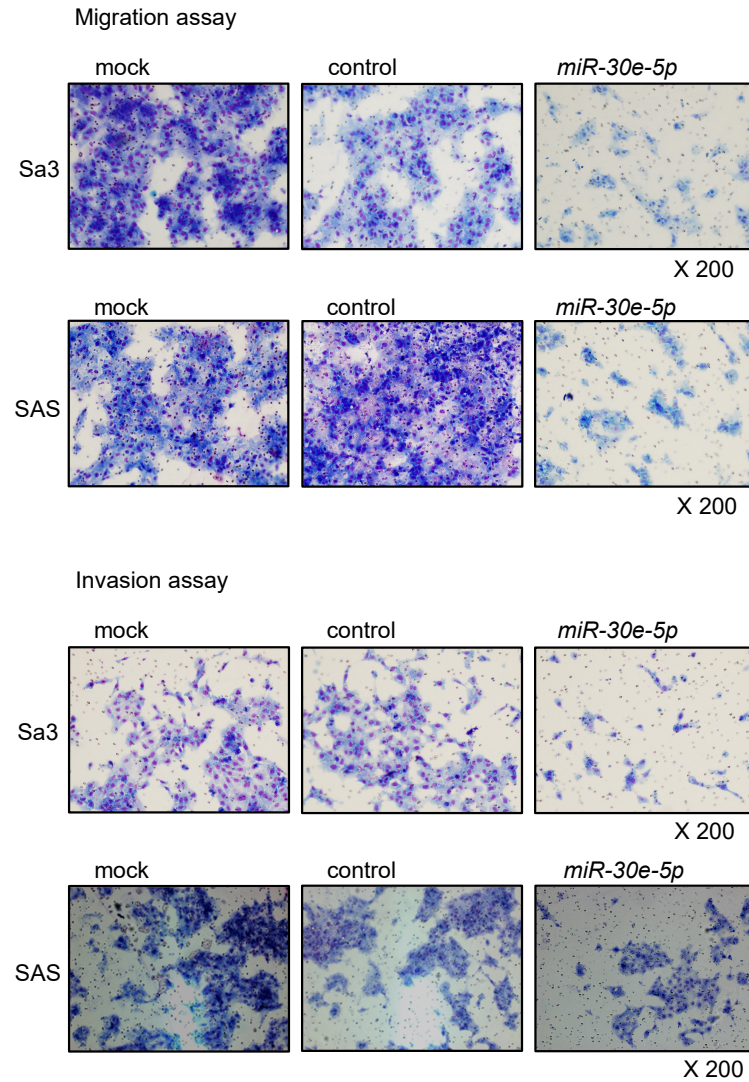

**Figure S1: Photomicrographs of cells subjected to migration and invasion assays.** Typical images of migration and invasion assays of Sa3 and SAS HNSCC cells following *miR-30e-5p* transfection.

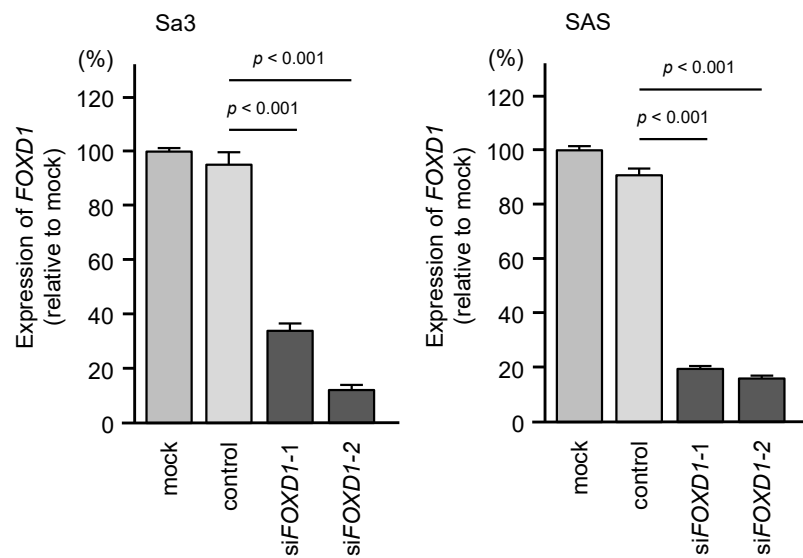

**Figure S2: Efficiency of siRNA mediated *FOX D1* knockdown in HNSCC cell lines (Sa3 and SAS cells).** The efficiency of *FOX D1* knockdown by two siRNAs targeting *FOX D1* (siFOX D1-1 and siFOX D1-2,) was evaluated by qRT-PCR. The *FOX D1* mRNA levels were measured at 72 h after siRNA transfection. *GAPDH* levels were used as internal controls.

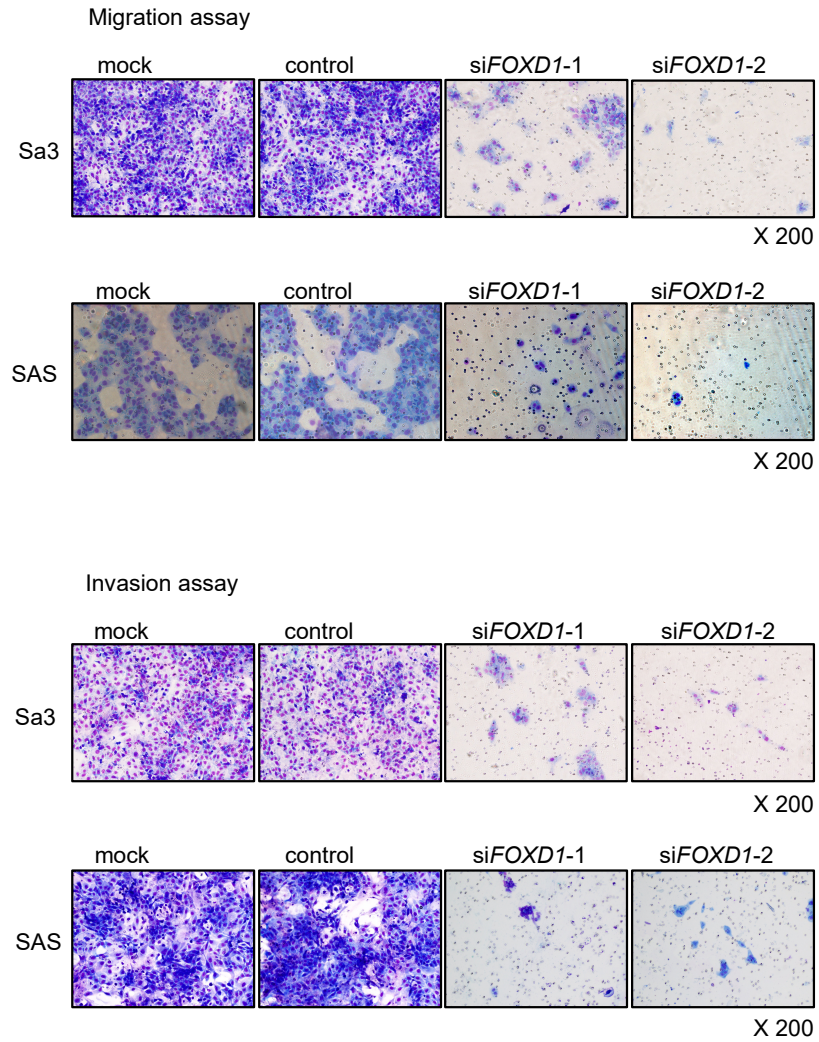

**Figure S3: Photomicrographs of cells subjected to migration and invasion assays.**  
 Typical images of migration and invasion assays of Sa3 and SAS HNSCC cells following siFOX D1-1 and siFOX D1-2 transfection.
